# Supplementary material
Source: PubMed Central journal article supplement (PMC6013664)
Supplement: IAI.00135-18_zii999092459s1.pdf [file IAI.00135-18_zii999092459s1.pdf]

Supplementary Table 1: Differentially expressed transcripts, lung surfactant over lactate-alone.

| Transcript ID      | survanta Bi-weight Avg Signal (log2) | lactate Bi-weight Avg Signal (log2) | Fold Change (linear) (Survanta/lactate) | ANOVA p-value | Gene Title           | Locus Tag       | Target Description                                            |
|--------------------|--------------------------------------|-------------------------------------|-----------------------------------------|---------------|----------------------|-----------------|---------------------------------------------------------------|
| CP000647-002024_at | 10.02                                | 5.76                                | 19.16                                   | 0.013213      | <i>dhCA</i>          | KPN_02053       | putative acetyl-CoA:acetoacetyl-CoA transferase alpha subunit |
| CP000647-004291_at | 11.67                                | 8.06                                | 12.25                                   | 0.003561      | <i>fadB</i>          | KPN_04340       | 4-enzyme protein: 3-hydroxyacyl-CoA dehydrogenase             |
| CP000647-000228_at | 12.29                                | 8.7                                 | 12.06                                   | 0.003477      | <i>fadE</i>          | KPN_00235       | acyl-CoA dehydrogenase                                        |
| CP000647-002025_at | 9.51                                 | 5.97                                | 11.69                                   | 0.009721      | <i>dhCB</i>          | KPN_02054       | putative acetyl-CoA:acetoacetyl-CoA transferase beta subunit  |
| CP000647-002029_at | 8.04                                 | 4.92                                | 8.68                                    | 0.001302      | <i>KPN_02058</i>     | KPN_02058       | putative transcriptional regulator (LysR family)              |
| CP000647-002026_at | 7.88                                 | 4.81                                | 8.41                                    | 0.005143      | <i>atoB</i>          | KPN_02055       | beta-ketothiolase                                             |
| CP000647-001963_at | 7.96                                 | 5.07                                | 7.41                                    | 0.005082      | <i>nemaA</i>         | KPN_01989       | N-ethylmaleimide reductase                                    |
| CP000647-003219_at | 9.34                                 | 6.6                                 | 6.67                                    | 0.029047      | <i>mrkC</i>          | KPN_03278       | putative bacterial pili assembly chaperone                    |
| CP000647-002466_at | 7.46                                 | 4.83                                | 6.16                                    | 0.006439      | <i>Kp52D</i>         | KPN_02505       | Possible glycosyltransferase                                  |
| CP000647-004290_at | 11.02                                | 8.44                                | 5.96                                    | 0.006467      | <i>fadA</i>          | KPN_04339       | acetyl-CoA acetyltransferase                                  |
| CP000647-002028_at | 7.86                                 | 5.29                                | 5.94                                    | 0.005519      | <i>KPN_02057</i>     | KPN_02057       | short chain dehydrogenase                                     |
| CP000647-001609_at | 9.14                                 | 6.66                                | 5.58                                    | 0.015562      | <i>ynel</i>          | KPN_01635       | putative aldehyde dehydrogenase                               |
| CP000647-001133_at | 9.46                                 | 7.02                                | 5.4                                     | 0.012926      | <i>KPN_01159</i>     | KPN_01159       | hypothetical protein                                          |
| CP000647-000398_at | 8.85                                 | 6.43                                | 5.36                                    | 0.007495      | <i>queC</i>          | KPN_00406       | putative (aluminum) resistance protein                        |
| CP000647-002027_at | 7.72                                 | 5.39                                | 5.04                                    | 0.013195      | <i>bdhB</i>          | KPN_02056       | 3-hydroxybutyryl-CoA dehydrogenase                            |
| CP000647-002684_at | 10.34                                | 8.04                                | 4.93                                    | 0.000741      | <i>fadI</i>          | KPN_02724       | acetyl-CoA acetyltransferase                                  |
| CP000647-001539_at | 11.05                                | 8.82                                | 4.68                                    | 0.006105      | <i>mdtJ</i>          | KPN_01565       | multidrug transport protein (SMR superfamily)                 |
| CP000647-003218_at | 8.79                                 | 6.64                                | 4.44                                    | 0.022995      | <i>mrkB</i>          | KPN_03277       | putative fimbrial usher protein                               |
| CP000647-001290_at | 11.27                                | 9.13                                | 4.41                                    | 0.01338       | <i>KPN_01316</i>     | KPN_01316       | hypothetical protein                                          |
| CP000647-002957_at | 5.37                                 | 3.37                                | 4                                       | 0.008294      | <i>proV</i>          | KPN_03008       | ATP-binding component of transport system for glycine         |
| CP000647-002683_at | 9.82                                 | 7.82                                | 3.99                                    | 0.009272      | <i>fadJ</i>          | KPN_02723       | bifunctional fatty acid oxidation complex protein             |
| CP000650-000047_at | 9.13                                 | 7.17                                | 3.88                                    | 0.013586      | <i>PN_pKPN5p0820</i> | KPN_pKPN5p08207 | hypothetical protein                                          |
| CP000647-003485_at | 8.95                                 | 7.02                                | 3.82                                    | 0.028091      | <i>fadH</i>          | KPN_03510       | 2,4-dienoyl-CoA reductase                                     |
| CP000647-001701_at | 7.55                                 | 5.68                                | 3.65                                    | 0.000961      | <i>KPN_01727</i>     | KPN_01727       | hypothetical protein                                          |
| CP000647-001650_at | 8.55                                 | 6.75                                | 3.49                                    | 0.003375      | <i>KPN_01676</i>     | KPN_01676       | hypothetical protein                                          |
| CP000647-003455_at | 7.78                                 | 5.98                                | 3.47                                    | 0.022547      | <i>evgA</i>          | KPN_03480       | putative bacterial regulatory protein                         |
| CP000647-004074_at | 11.02                                | 9.24                                | 3.44                                    | 0.029644      | <i>KPN_04108</i>     | KPN_04108       | putative inner membrane protein                               |
| CP000647-004398_at | 8.85                                 | 7.1                                 | 3.37                                    | 0.033145      | <i>yjcB</i>          | KPN_04460       | hypothetical protein                                          |
| CP000647-002775_at | 6.36                                 | 4.61                                | 3.36                                    | 0.035152      | <i>KPN_02822</i>     | KPN_02822       | putative glycoside hydrolase                                  |
| CP000647-002522_at | 8.04                                 | 6.3                                 | 3.34                                    | 0.000233      | <i>yehS</i>          | KPN_02561       | hypothetical protein                                          |
| CP000647-003220_at | 12.01                                | 10.28                               | 3.32                                    | 0.04074       | <i>mrkD</i>          | KPN_03279       | putative fimbrial-like protein                                |
| CP000648-000028_at | 5.31                                 | 3.62                                | 3.22                                    | 0.028084      | <i>PN_pKPN3p0588</i> | KPN_pKPN3p05887 | transposase                                                   |
| CP000647-004349_at | 7.66                                 | 5.98                                | 3.19                                    | 0.037534      | <i>yfeH</i>          | KPN_04411       | putative cytochrome oxidase                                   |
| CP000647-003813_at | 7.29                                 | 5.64                                | 3.14                                    | 0.01725       | <i>arnA</i>          | KPN_03845       | hypothetical protein                                          |
| CP000647-000367_at | 7.63                                 | 5.98                                | 3.14                                    | 0.042949      | <i>thiL</i>          | KPN_00375       | thiamine biosynthesis protein ThiL                            |
| CP000650-000032_at | 6.33                                 | 4.7                                 | 3.11                                    | 0.001789      | <i>glnp-like</i>     | KPN_pKPN5p08192 | hypothetical protein                                          |
| CP000647-002147_at | 7.95                                 | 6.32                                | 3.09                                    | 0.001374      | <i>pheS</i>          | KPN_02176       | phenylalanyl-tRNA synthetase alpha subunit                    |
| CP000647-004348_at | 6.95                                 | 5.34                                | 3.07                                    | 0.011945      | <i>yjbD</i>          | KPN_04410       | hypothetical protein                                          |
| CP000647-003046_at | 7.86                                 | 6.24                                | 3.06                                    | 0.020144      | <i>KPN_03102</i>     | KPN_03102       | putative cytoplasmic protein                                  |
| CP000647-003392_at | 7.86                                 | 6.26                                | 3.03                                    | 0.029265      | <i>zupT</i>          | KPN_03453       | zinc transporter ZupT                                         |
| CP000647-000079_at | 8.79                                 | 7.24                                | 2.92                                    | 0.015548      | <i>leuB</i>          | KPN_00079       | 3-isopropylmalate dehydrogenase                               |
| CP000647-001367_at | 5.56                                 | 4.02                                | 2.91                                    | 0.003218      | <i>KPN_01393</i>     | KPN_01393       | hypothetical protein                                          |
| CP000647-004363_at | 9.81                                 | 8.27                                | 2.91                                    | 0.031979      | <i>lamB</i>          | KPN_04425       | maltoporin precursor                                          |
| CP000647-000117_at | 9.49                                 | 7.95                                | 2.9                                     | 0.047796      | <i>pdhR</i>          | KPN_00117       | transcriptional regulator of pyruvate dehydrogenase complex   |
| CP000647-000856_at | 11.33                                | 9.8                                 | 2.89                                    | 0.02951       | <i>ybjM</i>          | KPN_00879       | hypothetical protein                                          |
| CP000647-001344_at | 7.52                                 | 6                                   | 2.85                                    | 0.00818       | <i>KPN_01370</i>     | KPN_01370       | hypothetical protein                                          |

|                      |       |      |       |          |                      |                 |                                                            |
|----------------------|-------|------|-------|----------|----------------------|-----------------|------------------------------------------------------------|
| CP000647-004111_at   | 8.39  | 6.89 | 2.83  | 0.024055 | <i>gidB</i>          | KPN_04145       | glucose-inhibited division protein B                       |
| CP000647-002444_at   | 8.67  | 7.17 | 2.83  | 0.030008 | <i>KPN_02483</i>     | KPN_02483       | Possible glycosylhydrolase                                 |
| CP000647-001962_at   | 7.62  | 6.14 | 2.79  | 0.020701 | <i>nemR</i>          | KPN_01988       | hypothetical transcriptional regulator                     |
| CP000647-002176_at   | 9.04  | 7.57 | 2.78  | 0.027301 | <i>ychJ</i>          | KPN_02205       | hypothetical protein                                       |
| CP000647-000405_at   | 7.54  | 6.08 | 2.74  | 0.034841 | <i>glnK</i>          | KPN_00413       | nitrogen regulatory protein P-II 2                         |
| CP000647-001134_at   | 6.74  | 5.29 | 2.74  | 0.037908 | <i>KPN_01160</i>     | KPN_01160       | hypothetical protein                                       |
| CP000647-002403_at   | 6.62  | 5.17 | 2.73  | 0.011601 | <i>KPN_02440</i>     | KPN_02440       | putative bacterial regulatory protein                      |
| CP000647-001540_at   | 7.27  | 5.82 | 2.73  | 0.023785 | <i>mdtI</i>          | KPN_01566       | multidrug transport protein (SMR superfamily)              |
| CP000647-001528_at   | 6.6   | 5.15 | 2.72  | 0.005243 | <i>mgo</i>           | KPN_01554       | malate:quinone oxidoreductase                              |
| CP000648-000015_at   | 7.55  | 6.11 | 2.71  | 0.025646 | <i>PN_pKPN3p0587</i> | KPN_pKPN3p05873 | putative alginate lyase                                    |
| CP000647-000736_s_at | 8.92  | 7.49 | 2.7   | 0.006465 | <i>KPN_00759</i>     | KPN_00759       | putative IS1 transposase                                   |
| CP000647-000861_at   | 10.47 | 9.05 | 2.68  | 0.002334 | <i>ybjN</i>          | KPN_00884       | putative sensory transduction regulator                    |
| CP000650-000020_at   | 10.78 | 9.36 | 2.67  | 0.010714 | <i>strB</i>          | KPN_pKPN5p08180 | streptomycin resistance protein B                          |
| CP000647-004497_at   | 6.52  | 5.11 | 2.66  | 0.037031 | <i>KPN_04560</i>     | KPN_04560       | putative arginine-binding periplasmic protein              |
| CP000647-003528_at   | 7.59  | 6.18 | 2.65  | 0.013587 | <i>fic</i>           | KPN_03553       | hypothetical protein                                       |
| CP000647-003598_at   | 8.87  | 7.46 | 2.64  | 0.000487 | <i>gltD</i>          | KPN_03625       | glutamate synthase                                         |
| CP000647-001852_at   | 7.32  | 5.94 | 2.61  | 0.014432 | <i>KPN_01878</i>     | KPN_01878       | putative transcriptional regulator                         |
| CP000647-001703_at   | 7.73  | 6.34 | 2.61  | 0.029647 | <i>KPN_01729</i>     | KPN_01729       | carbohydrate kinase                                        |
| CP000647-000515_at   | 7.04  | 5.66 | 2.61  | 0.04942  | <i>KPN_00524</i>     | KPN_00524       | putative bacterial extracellular solute-binding protein    |
| CP000647-002800_at   | 8.58  | 7.2  | 2.6   | 0.007315 | <i>yfgB</i>          | KPN_02847       | putative pyruvate formate lyase activating enzyme 2        |
| CP000647-000255_at   | 7.27  | 5.9  | 2.59  | 0.008787 | <i>stbE</i>          | KPN_00262       | putative fimbriae                                          |
| CP000647-002034_at   | 7.72  | 6.34 | 2.59  | 0.034923 | <i>KPN_02063</i>     | KPN_02063       | putative acetyl transferase                                |
| CP000650-000033_at   | 9.82  | 8.45 | 2.59  | 0.036231 | <i>PN_pKPN5p0819</i> | KPN_pKPN5p08193 | hypothetical protein                                       |
| CP000647-003903_at   | 6.73  | 5.36 | 2.58  | 0.003115 | <i>avtA</i>          | KPN_03936       | valine-pyruvate transaminase                               |
| CP000647-003489_at   | 7.46  | 6.09 | 2.57  | 0.016169 | <i>ygjP</i>          | KPN_03514       | hypothetical protein                                       |
| CP000647-002454_at   | 9.14  | 7.78 | 2.57  | 0.025707 | <i>ugd</i>           | KPN_02493       | UDP-glucose dehydrogenase                                  |
| CP000647-001848_at   | 8.61  | 7.26 | 2.56  | 0.018339 | <i>catC</i>          | KPN_01874       | putative muconolactone delta-isomerase                     |
| CP000647-003217_at   | 6.72  | 5.37 | 2.55  | 0.00088  | <i>mrkA</i>          | KPN_03276       | putative fimbrial-like protein                             |
| CP000647-000101_at   | 9.02  | 7.66 | 2.55  | 0.015677 | <i>secM</i>          | KPN_00101       | SecA regulator SecM                                        |
| CP000647-002954_at   | 10.03 | 8.69 | 2.54  | 0.042808 | <i>nrpI</i>          | KPN_03005       | hypothetical protein                                       |
| CP000647-000165_at   | 8.19  | 6.85 | 2.53  | 0.004475 | <i>fhuA</i>          | KPN_00165       | outer membrane pore protein                                |
| CP000647-000102_at   | 9.24  | 7.9  | 2.53  | 0.039615 | <i>secA</i>          | KPN_00102       | translocase                                                |
| CP000647-000213_at   | 7.19  | 5.86 | 2.52  | 0.04867  | <i>KPN_00213</i>     | KPN_00213       | D- and L-methionine transport protein (ABC superfamily)    |
| CP000647-000460_at   | 6.52  | 5.19 | 2.51  | 0.016441 | <i>ybbL</i>          | KPN_00468       | putative ATP-binding component of a transport system       |
| CP000647-000769_at   | 6.77  | 8.37 | -3.04 | 0.009176 | <i>hutI</i>          | KPN_00792       | Imidazolonepropionase                                      |
| CP000647-000773_at   | 5.18  | 6.85 | -3.17 | 0.002584 | <i>hutH</i>          | KPN_00796       | histidine ammonia lyase                                    |
| CP000647-001453_at   | 6.9   | 8.73 | -3.55 | 0.006045 | <i>paaK</i>          | KPN_01479       | phenylacetate-CoA ligase                                   |
| CP000647-001448_at   | 6.57  | 8.91 | -5.06 | 0.036461 | <i>paaF</i>          | KPN_01474       | probable enoyl-CoA hydratase                               |
| CP000647-000772_at   | 5.1   | 7.45 | -5.08 | 0.013334 | <i>hutU</i>          | KPN_00795       | putative urocanase                                         |
| CP000647-001445_at   | 5.74  | 8.12 | -5.23 | 0.016451 | <i>paaC</i>          | KPN_01471       | phenylacetic acid degradation protein                      |
| CP000647-001451_at   | 6.82  | 9.24 | -5.35 | 0.031845 | <i>paal</i>          | KPN_01477       | phenylacetic acid degradation protein                      |
| CP000647-001447_at   | 6.32  | 8.87 | -5.86 | 0.046877 | <i>paaE</i>          | KPN_01473       | probable phenylacetic acid degradation NADH oxidoreductase |
| CP000647-001446_at   | 6.01  | 8.75 | -6.65 | 0.020266 | <i>paaD</i>          | KPN_01472       | phenylacetic acid degradation protein                      |

| Transcript Class                   | No. of transcripts |
|------------------------------------|--------------------|
| general metabolism                 | 20                 |
| phospholipid/fatty acid metabolism | 12                 |
| hypothetical                       | 16                 |

|                              |   |
|------------------------------|---|
| <b>nitrogen metabolism</b>   | 9 |
| <b>oxidative stress</b>      | 3 |
| <b>membrane stress</b>       | 2 |
| <b>virulence</b>             | 4 |
| <b>gene regulation</b>       | 6 |
| <b>cytosolic stress</b>      | 5 |
| <b>biofilm</b>               | 6 |
| <b>antibiotic resistance</b> | 3 |
| <b>cation transport</b>      | 3 |

Supplementary Table 2: Primers used in this study

| Primer Name              | Sequence                                    | Function                               |
|--------------------------|---------------------------------------------|----------------------------------------|
| Kppri_leuABCD_KO_F1_PvuI | aatcgatcgAGACGCACAGATGGAACACG               | <i>leuABCD</i> gene deletion construct |
| Kppri_leuABCD_KO_SOE_R1  | gccacgcatcaacggctCTACTGGCTCATGGTTGGATCCTT   | <i>leuABCD</i> gene deletion construct |
| Kppri_leuABCD_KO_SOE_F2  | taggaccgttgatgctggcGCAAGCTGCCGGCGTTTATG     | <i>leuABCD</i> gene deletion construct |
| Kppri_leuABCD_KO_R2_PvuI | taacgatcgTCCTGGCAGAGCTCAAGAATAC             | <i>leuABCD</i> gene deletion construct |
| Kppri_proV_R2_KpnI       | aataggtaccAAGGCGAGTGAAGCCCC                 | <i>proV</i> gene deletion construct    |
| Kppri_proV_KO_SOE_F2     | gTGActgTAGGTGTGAGTcAGCGAGGGGTGAATCATGGCTGA  | <i>proV</i> gene deletion construct    |
| Kppri_proV_SOE_R1        | tGACTCACACCTAcagTCAcGCCATGCAATAGAGAAGTTCTCG | <i>proV</i> gene deletion construct    |
| Kppri_proV_KO_F1_SphI    | atagcatgcTTCGCGTCTTTACCGGATTGA              | <i>proV</i> gene deletion construct    |
| Kppri_mrk_KO_F1_bamHI    | atagatccGATGGCGTGTATGGGATTGA                | <i>mrkABC</i> gene deletion construct  |
| Kppri_mrk_KO_SOE_R1      | gctctagcgtcacactcacgtCATTGCCATTTCTTGTCAGAG  | <i>mrkABC</i> gene deletion construct  |
| Kppri_mrk_KO_SOE_F2      | acgtgagtgtagcctagagcTAAGTGACGTTAAAGGCCGGG   | <i>mrkABC</i> gene deletion construct  |
| Kppri_mrk_KO_R2_kpnI     | taaggtaccGGTTCATAGCCACCGCATCCA              | <i>mrkABC</i> gene deletion construct  |
| Kppri_mdtJI_KO_F1_xmaI   | taTcccGGATGGCGCCCATACCTTCTAC                | <i>mdtJI</i> gene deletion construct   |
| Kppri_mdtJI_KO-SOER1     | gctgcgagTCAtcgTTAactCATGATCCCTTCTCTGCTTGAGA | <i>mdtJI</i> gene deletion construct   |
| kppri_mdtJI_KO-SOEF2     | agtTAAcgaTGActgagcagcTGACGTCTCCGCCGCTGCAAAG | <i>mdtJI</i> gene deletion construct   |
| Kppri_mdtJI_KO_R2_xmaI   | AAATcccgggAGCACAAGCAGAACACTGGT              | <i>mdtJI</i> gene deletion construct   |
| Kppri_leu_KO_scrn_F      | CCGCTGGATTACTTCAATGTC                       | PCR screen for gene deletion           |
| Kppri_leu_KO_scrn_R      | CGATATCCGTTGCCAGACCAA                       | PCR screen for gene deletion           |
| kppri_proV_KO_scrnR      | TCAATCGAGACAATCCCGACA                       | PCR screen for gene deletion           |
| Kppri_proV_KO_scrnF      | CAGGCGAAGCATCAACGCA                         | PCR screen for gene deletion           |
| Kppri_mrkC_KO_scrnF      | GTAGGCGGGTCCGATAACAG                        | PCR screen for gene deletion           |
| Kppri_mrkC_KO_scrnR      | CGCTTCTTACCAGACCT                           | PCR screen for gene deletion           |
| Kppri_mdtJI_KO_scrnR     | CCAGGGACAGAATGCCGTA                         | PCR screen for gene deletion           |
| Kppri_mdtJI_KO_scrn_F    | CTATGCGTTGTGGGAAGGG                         | PCR screen for gene deletion           |
| Kpn_mdtJ_qRT_R           | TTTTTCTGGGTGCCGACTT                         | qRT-PCR                                |
| Kpn_leuB_qRT_F           | ACCAGCCAGTATGACGTTGG                        | qRT-PCR                                |
| Kpn_leuB_qRT_R           | AGCCCTGATACAGTTTGGC                         | qRT-PCR                                |
| Kpn_04184_qRT_F          | CGC TGG TTG AGG CAT TTA TT                  | qRT-PCR                                |
| Kpn_04184_qRT_R          | GCT GAA CAT GGC TAA CTG AC                  | qRT-PCR                                |
| Kpn_proV_qRT_F           | CAT GGT TCG CCT TCT CAA TC                  | qRT-PCR                                |
| Kpn_proV_qRT_R           | AAG GAC TGA AAA ACC ATC GC                  | qRT-PCR                                |
| Kpn_02789_qRT_F          | CCA TCC GTT TGC TGT TAC TG                  | qRT-PCR                                |
| Kpn_02789_qRT_R          | CCG TTT TTG ACG AAG ATG CT                  | qRT-PCR                                |
| Kpn_mrkB_qRT_F           | TAA AGA GAC GCT GTG GTG GC                  | qRT-PCR                                |
| Kpn_mrkB_qRT_R           | TTG ATG GCG AGA CTA CTG CC                  | qRT-PCR                                |
| Kpn_fadB_qRT_F           | AAG ATG TCG AGA CGC CGA AG                  | qRT-PCR                                |
| Kpn_fadB_qRT_R           | GGT TTC CGC TAG TAC GGC TT                  | qRT-PCR                                |
| Kpn_02053_qRT_F          | CCATTTGTTACGGGTCAGC                         | qRT-PCR                                |
| Kpn_02053_qRT_R          | CGGCCGACACTACATCCTT                         | qRT-PCR                                |
| Kpn_03845_qRT_R          | ATG CTC AAC GTC CTG GTA GC                  | qRT-PCR                                |
| Kpn_03845_qRT_F          | CTG CGA CGG GCA GAT CAT TA                  | qRT-PCR                                |
